# Supplementary material for: Hepatic loss of Lissencephaly 1 (Lis1) induces fatty liver and accelerates liver tumorigenesis in mice
Source: PubMed Central journal article supplement (PMC5892582; doi:10.1074/jbc.ra117.001474), 2018-02-23
Supplement: supp_RA117.001474_134696_2_supp_78898_p4fcp3.pdf [file supp_RA117.001474_134696_2_supp_78898_p4fcp3.pdf]

Table S2 Li *et al.*

Table S2. The sequences of qPCR primers for mouse genes.

|        | Forward                  | Reverse                 |
|--------|--------------------------|-------------------------|
| Hspa5  | TGTCTTCTCAGCATCAAGCAAGG  | CCAACACTTCCTGGACAGGCTT  |
| Erdj4  | AGCCATGAAGTACCACCCTGAC   | CGACTATTGGCATCCGAGAGTG  |
| Gadd34 | GGCGGCTCAGATTGTTCAAAGC   | CCAGACAGCAAGGAAATGGACTG |
| Chop   | GGAGGTCCTGTCCTCAGATGAA   | GCTCCTCTGTCAGCCAAGCTAG  |
| Xbp1s  | TGGACTCTGACACTGTTGCCTC   | TAGACCTCTGGGAGTTCCTCCA  |
| Lis1   | GTCTCTGCTTCAGAGGATGCTAC  | CTGCTGAACAGGAAGCCAGAAG  |
| Tnfa   | GGTGCCTATGTCTCAGCCTCTT   | GCCATAGAAGTATGAGAGGGAG  |
| Il1b   | TGGACCTTCCAGGATGAGGACA   | GTTTATCTCGGAGCCTGTAGTG  |
| Il2    | GCGGCATGTTCTGGATTTGACTC  | CCACCACAGTTGCTGACTCATC  |
| Il4    | ATCATCGGCATTTTGAACGAGGTC | ACCTTGGAAGCCCTACAGACGA  |
| Il6    | TACCACTTCACAAGTCGGAGGC   | CTGCAAGTGCATCATCGTTGTTC |
| F4/80  | CGTGTTGTTGGTGGCACTGTGA   | CCACATCAGTGTTCCAGGAGAC  |
| Fasn   | CACAGTGCTCAAAGGACATGCC   | CACCAGGTGTAGTGCCTTCCTC  |
| Acc1   | GTTCTGTTGGACAACGCCTTCAC  | GGAGTCACAGAAGCAGCCCATT  |
| Scd1   | GCAAGCTCTACACCTGCCTCTT   | CGTGCCTTGTAAGTTCTGTGGC  |
| Gpam   | GCAAGCACTGTTACCAGCGATC   | TGCAATCAGCCTTCGTCGGAAG  |
| Elov16 | CGGCATCTGATGAACAAGCGAG   | GTACAGCATGTAAGCACCAGTTC |
| Elov17 | TCAGTCGCCAAGAGCAATGAGG   | GACATGAAGGAAAGTCACTTGGC |
| Ppar   | GTAAGTGTGCGTTTCAGAAGTGCC | ATCTCCGCCAACAGCTTCTCCT  |
| Cd36   | GGACATTGAGATTCTTTTCCTCTG | GCAAAGGCATTGGCTGGAAGAAC |
| Cidea  | GGTGGACACAGAGGAGTTCTTTC  | CGAAGGTGACTCTGGCTATTCC  |
| Mogat1 | CCAGCACTACTTTGGCATAATGC  | CCTCTAGGTATGTCTGATGCAGC |
